# Supplementary material for: Facile preparation of polysaccharide-based sponges and their potential application in wound dressing
Source: Royal Society of Chemistry journal article supplement (doi:10.1039/c7tb03000b), 2018-01-01
Supplement: c7tb03000b1.pdf [file c7tb03000b1.pdf]

## Supporting information

### **Facile preparation of polysaccharide-based sponges and its potential application in wound dressing**

Huan Cheng<sup>†1</sup>, Chaojing Li<sup>‡2</sup>, Yujia Jiang<sup>1</sup>, Bijia Wang<sup>1</sup>, Fujun Wang<sup>2</sup>, Zhiping Mao<sup>1</sup>,  
Hong Xu<sup>1</sup>, Lu Wang<sup>\*2</sup>, and Xiaofeng Sui<sup>\*1</sup>

*<sup>1</sup>Key Lab of Science and Technology of Eco-textile, Ministry of Education, Donghua University, China,*

*<sup>2</sup>Key Lab of Textile Science and Technology, Ministry of Education, Donghua University, China*

*\*Corresponding authors:*

*Tel.: +86 21 67792605. Fax: +86 21 67792707.*

*E-mail: [suixf@dhu.edu.cn](mailto:suixf@dhu.edu.cn), [wanglu@dhu.edu.cn](mailto:wanglu@dhu.edu.cn)*

*† These authors contributed equally to this paper.*

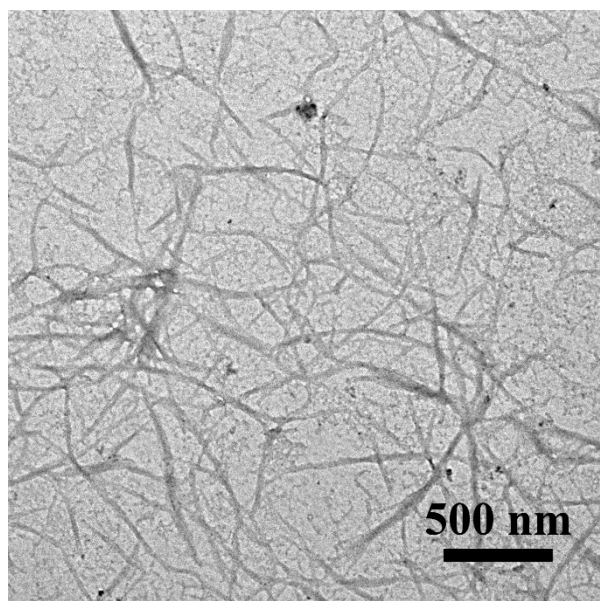

**Figure S1.** The TEM image of cellulose nanofiber.

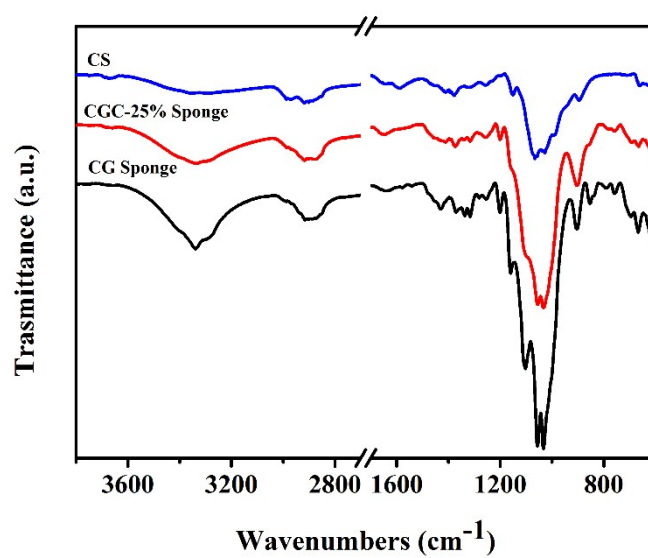

**Figure S2.** FT-IR spectra of CS, CG sponge, and CGC-25% sponge.
